# Supplementary material for: Impact of Salvage Surgery on Health-Related Quality of Life in Oral Squamous Cell Carcinoma: A Prospective Multi-Center Study
Source: MDPI journal article supplement (doi:10.3390/jcm12206602), 2023-10-18
Supplement: s1 [file s1]

**Table S1.** Linear mixed model regression for global health status difference adjusted to baseline.

|                                                                                                                                                                                                                                                                                      | Estimate | Lower CL | Upper CL | <i>p</i> -Value |
|--------------------------------------------------------------------------------------------------------------------------------------------------------------------------------------------------------------------------------------------------------------------------------------|----------|----------|----------|-----------------|
| Tumor stage: [1–2]                                                                                                                                                                                                                                                                   | 0        | -        | -        | -               |
| Tumor stage: [3–4]                                                                                                                                                                                                                                                                   | 12.403   | -7.982   | 32.788   | 0.225           |
| Gender: Man                                                                                                                                                                                                                                                                          | 0        | -        | -        |                 |
| Gender: Woman                                                                                                                                                                                                                                                                        | -6.486   | -25.744  | 12.773   | 0.499           |
| Age                                                                                                                                                                                                                                                                                  | 0.959    | 0.072    | 1.846    | 0.035           |
| Interpretation: For two patients of the same age and gender and with a tumor in stage 1–2 and 3–4, respectively, the self-reported global health status score is ca. 12.4 points higher for the patient with a tumor in stage 3–4 compared to the patient with a tumor in stage 1–2. |          |          |          |                 |

**Table S2.** Linear mixed model regression for pain in the mouth difference adjusted to baseline.

|                                                                                                                                                                                                                                                                                  | Estimate | Lower CL | Upper CL | <i>p</i> -Value |
|----------------------------------------------------------------------------------------------------------------------------------------------------------------------------------------------------------------------------------------------------------------------------------|----------|----------|----------|-----------------|
| Tumor stage: [1–2]                                                                                                                                                                                                                                                               | 0        | -        | -        | -               |
| Tumor stage: [3–4]                                                                                                                                                                                                                                                               | -13.505  | -33.728  | 6.717    | 0.184           |
| Gender: Man                                                                                                                                                                                                                                                                      | 0        | -        | -        |                 |
| Gender: Woman                                                                                                                                                                                                                                                                    | 6.877    | -12.124  | 25.878   | 0.467           |
| Age                                                                                                                                                                                                                                                                              | -0.872   | -1.725   | -0.019   | 0.045           |
| Interpretation: For two patients of the same age and gender and with a tumor in stage 1–2 and 3–4, respectively, the self-reported pain in the mouth score is ca. 13.5 points lower for the patient with a tumor in stage 3–4 compared to the patient with a tumor in stage 1–2. |          |          |          |                 |

**Table S3.** Linear mixed model regression for swallowing difference adjusted to baseline.

|                                                                                                                                                                                                                                                                                  | Estimate | Lower CL | Upper CL | <i>p</i> -Value |
|----------------------------------------------------------------------------------------------------------------------------------------------------------------------------------------------------------------------------------------------------------------------------------|----------|----------|----------|-----------------|
| Tumor stage: [1–2]                                                                                                                                                                                                                                                               | 0        | -        | -        | -               |
| Tumor stage: [3–4]                                                                                                                                                                                                                                                               | -1.102   | -19.758  | 17.553   | 0.905           |
| Gender: Man                                                                                                                                                                                                                                                                      | 0        | -        | -        |                 |
| Gender: Woman                                                                                                                                                                                                                                                                    | -8.454   | -25.893  | 8.984    | 0.332           |
| Age                                                                                                                                                                                                                                                                              | -0.315   | -1.105   | 0.476    | 0.424           |
| Interpretation: For two patients of the same age and gender and with a tumor in stage 1–2 and 3–4, respectively, the self-reported swallowing function score is ca. 1 points higher for the patient with a tumor in stage 3–4 compared to the patient with a tumor in stage 1–2. |          |          |          |                 |

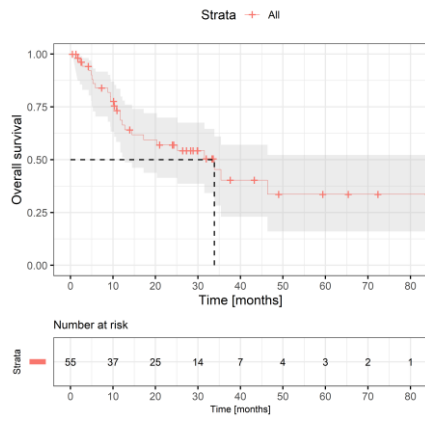

(a)

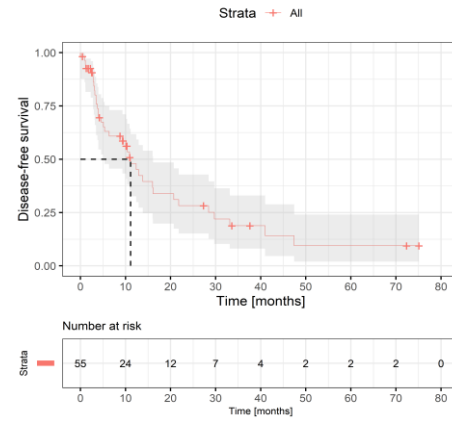

(b)

**Figure S1** (a) Estimated overall survival of all patients, median overall survival 33.9 months. (b) Estimated disease-free survival of all patients, median disease-free survival 11.1 months
